# Supplementary material for: Circadian rhythms have significant effects on leaf-to-canopy scale gas exchange under field conditions
Source: PubMed Central journal article supplement (PMC5072338; doi:10.1186/s13742-016-0149-y), 2016-10-20

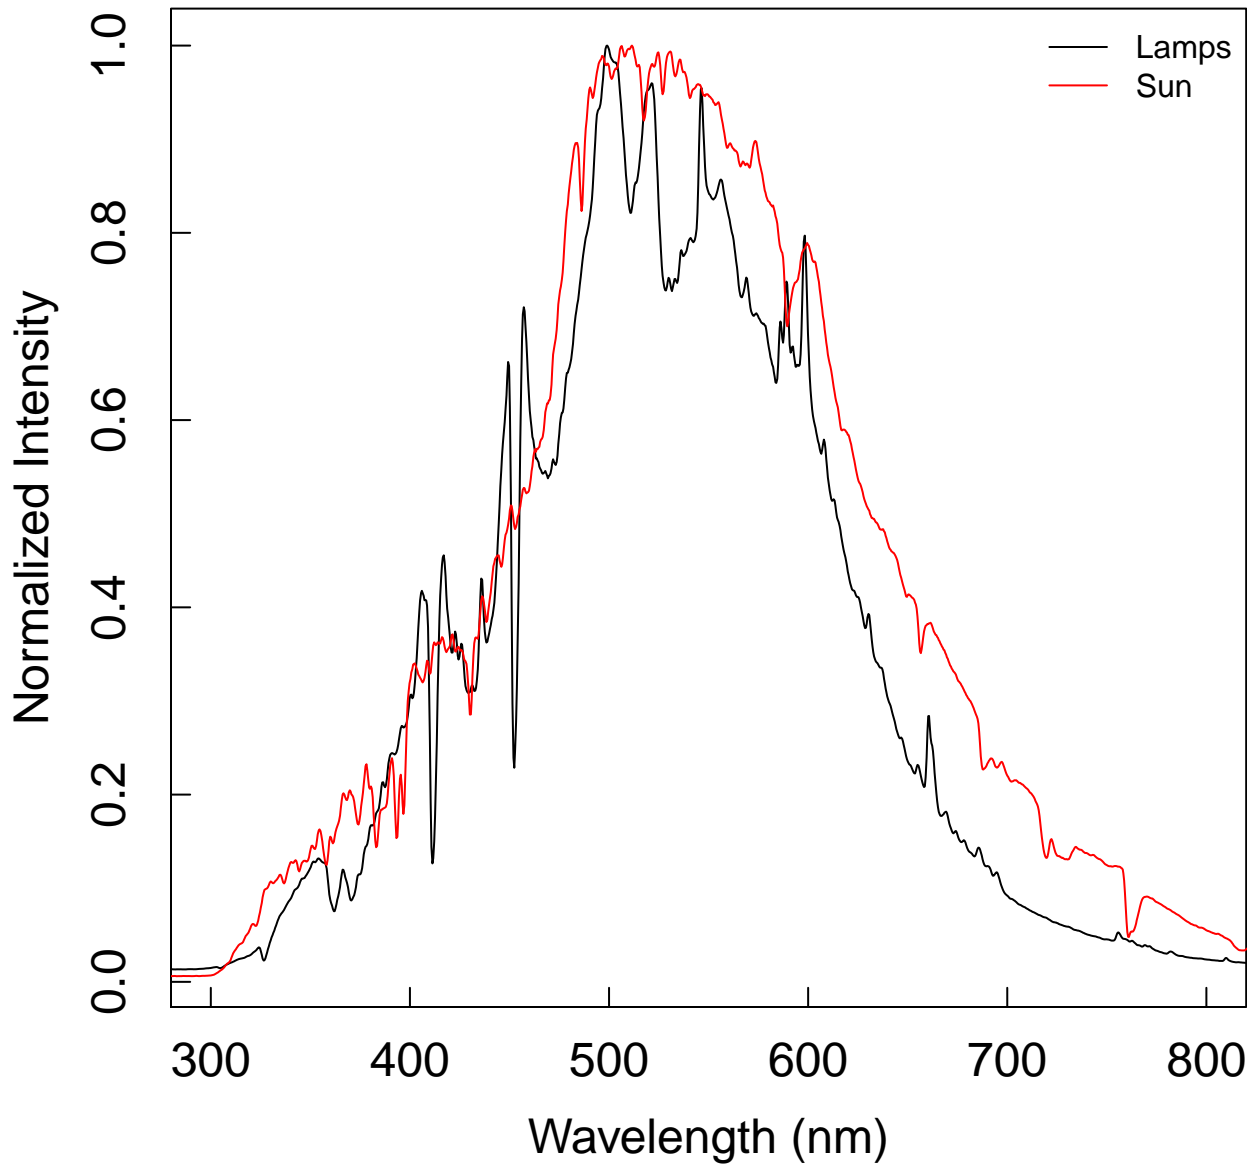

Supplement: 13742_2016_149_MOESM1_ESM.pdf [file 13742_2016_149_MOESM1_ESM.pdf]
