# Supplementary material for: Circadian rhythms have significant effects on leaf-to-canopy scale gas exchange under field conditions
Source: PubMed Central journal article supplement (PMC5072338; doi:10.1186/s13742-016-0149-y), 2016-10-20
Supplement: 13742_2016_149_MOESM2_ESM.pdf [file 13742_2016_149_MOESM2_ESM.pdf]

A commonality across the stomatal models used [1-3] is that photosynthesis ( $A_l$ ) acts as a driver of stomatal conductance ( $g_s$ ). We will now describe the model of Medlyn et al. [1], but we note that the same rationale applies to all other models. There are three variables driving this model:

$$g_s = g_0 + \left(1 + \frac{g_1}{\sqrt{VPD}}\right) \frac{A_l}{C_a}$$

namely, vapor pressure deficit (VPD),  $A_l$  and  $\text{CO}_2$  concentration ( $C_a$ ), with two fitting parameters ( $g_0$  and  $g_1$ ). Given that  $g_s$  and  $A_l$  are usually correlated [4, 5], even under constant environmental conditions the model has a reasonable goodness-of-fit (see Table 2), which is further enhanced by the addition of circadian oscillators (Table 2).

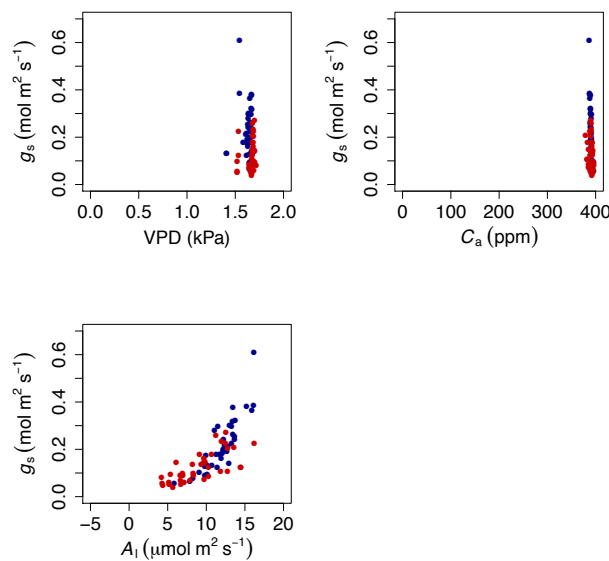

1. Medlyn BE, Duursma RA, Eamus D, Ellsworth DS, Prentice IC, Barton CVM, Crous KY, De Angelis P, Freeman M, Wingate L. Reconciling the optimal and empirical approaches to modelling stomatal conductance. *Glob Change Biol.* 2011;17:2134-2144.
2. Ball TJ, Woodrow IE, Berry JA. A model predicting stomatal conductance and its contribution to the control of photosynthesis under different environmental conditions. In: Biggins J, editor. *Progress in Photosynthesis Research.* vol. 4. Dordrecht: Martinus Nijhoff;1987:221-224.
3. Leuning R. A critical appraisal of a combined stomatal-photosynthesis model for C3 plants. *Plant Cell Environ* 1995;18:339-355.
4. Cowan IR, Farquhar GD. Stomatal function in relation to leaf metabolism and environment. In: Jennings DH, editor. *Integration of Activity in the Higher Plant.* Cambridge: Cambridge University Pres; 1977.
5. Wong SC, Cowan IR, Farquhar GD. Stomatal conductance correlates with photosynthetic capacity. *Nature* 1979;282:424-426.
